# Supplementary material for: Transcriptional regulator early growth response gene 2 (Egr2) is required for T cell anergy in vitro and in vivo
Source: PubMed Central journal article supplement — J Exp Med. 2012 Nov 19;209(12):2157–63. doi: 10.1084/jem.20120342 (PMC3501351; doi:10.1084/jem.20120342), 2012-11-19
Supplement: supp_jem.20120342_JEM_20120342_sm.pdf [file supp_jem.20120342_JEM_20120342_sm.pdf]

## SUPPLEMENTAL MATERIAL

Zheng et al., <http://www.jem.org/cgi/content/full/jem.20120342/DC1>**Table S1.** ChIP Assay primers used to confirm Egr2 association

| Gene         | Primers                                                                        |
|--------------|--------------------------------------------------------------------------------|
| <i>DGK-ζ</i> | Forward, 5'-GCAGACCTAGGACACGGTAGA-3';<br>Reverse, 5'-CTGTGGGCAGAAACAAACCT-3'   |
| <i>Cbl-b</i> | Forward, 5'-TAGGAAGGTGAGTGAGGCAGGAAG-3';<br>Reverse, 5'-CCAATGGGCGGGACGAGAC-3' |
| <i>Itch</i>  | Forward, 5'-AGTGTGGCGCTCGAGTCT-3';<br>Reverse, 5'-GCCAAGCACTAGCAGTTCG-3'       |
| <i>Tob1</i>  | Forward, 5'-GGGAGGAGGCTATAAAACGAG-3';<br>Reverse, 5'-GCGCTCGCTTCTTACACA-3'     |
| <i>Dtx1</i>  | Forward, 5'-CCTCCTGACACCCATCTC-3';<br>Reverse, 5'-GGGATTTCCTGGAGTTCAT-3'       |

**Table S2.** qRT-PCR primers and probes used to confirm dependency on Egr2 for expression in anergy

| Gene         | Primers                                                                     | Probe                           |
|--------------|-----------------------------------------------------------------------------|---------------------------------|
| <i>DGK-ζ</i> | Forward, 5'-CCCAAGGTGAAGAACTGATTG-3';<br>Reverse, 5'-TCTTCTGGTCACGGTGCAT-3' | 5'-GAGCAGGA-3' (Roche)          |
| <i>Cbl-b</i> | Forward, 5'-ATGTCCTCCTCGGCTTT-3';<br>Reverse, 5'-GAGACAATTTGCTAATGGACCAG-3' | 5'-CTTCTCCC-3' (Roche)          |
| <i>Itch</i>  | Ordered from Applied Biosystems                                             | Ordered from Applied Biosystems |
| <i>Tob1</i>  | Forward, 5'-TCCAGCTCTCCCTCACCTC-3';<br>Reverse, 5'-ACCGGGCATGAAGGTAG-3'     | 5'-TCTGCTGC-3' (Roche)          |
| <i>Dtx1</i>  | Forward, 5'-CCAACCCAGGCAAGAGTT-3';<br>Reverse, 5'-GATGAGCAATCTCAGCACCTT-3'  | 5'-AGCCAGAG-3' (Roche)          |
